# Supplementary material
Source: PubMed Central journal article supplement (PMC5568996)
Supplement: NIHMS856221-supplement-Supplementary_Material.pdf [file NIHMS856221-supplement-Supplementary_Material.pdf]

## ***Literature search***

The research was conducted on PubMed, Medline (Ovid), Scopus and PsycINFO (Ovid) with a dateline of February 2016, using these search filters in different combinations: ADHD or Attention-deficit/hyperactivity disorder, children, adults, gene, genetics, linkage, locus, copy number variants or CNV, genome wide association or GWA, expression, mRNA, microRNA, peripheral levels, biomarkers, plasma, serum, saliva, urine, cerebrospinal fluid; along with the consultation of database <http://adhd.psych.ac.cn/index.do> . Moreover we considered in our analyses seven (Lasky-Su et al. 2008; Neale et al. 2008; 2010; Mick et al. 2010; Hinney et al. 2011; Stergiakouli et al. 2012; Yang et al. 2013) and two (Lesh et al. 2008; Sanchez-Mora et al. 2015) SNPs-GWAS in children and adults with ADHD respectively, as well as ten (Elia et al. 2010; Williams et al. 2010; Elia et al. 2011; Lesch et al. 2011; Lionel et al. 2011; Stergiakouli et al. 2012; Williams et al. 2012; Yang et al. 2013; Akutagava-Martins et al. 2014; Jarick et al. 2014) and two (Akutagava-Martins et al. 2014; Ramos-Quiroga et al. 2014) CNVs-GWAS in children and adults with ADHD respectively. The most recent meta-analyses (Gizer et al. 2009; Landaas et al. 2010; Smith 2010; Reif et al. 2011; Sanchez-Mora et al. 2011; Wu et al. 2012; Shiffrin et al. 2013; Sun et al. 2014; Pan et al. 2015; Lee et al. 2015) of candidate genes have been divided into single studies.

### **Inclusion/exclusion criteria.**

We selected articles that met the following inclusion criteria: (1) ADHD diagnosis according to the Diagnostic and Statistical Manual of Mental Disorders—version IV (DSM-IV) or the International Classification of Diseases—10<sup>th</sup> Revision (ICD-10); (2) having a case-control or family-based study design for genomic studies, (3) having a drug free/naïve case-control study design for metabolomic studies; (4) longitudinal studies; 5) English language.

From these studies, we excluded those: a) performed on animals; b) using samples that did not separate children and adults; and c) that were reviews or case reports. To obtain a list of genes and proteins equally studied in both populations of children and adults with ADHD, we excluded the

studies where a gene or a protein was investigated or only in ADHD children or only in ADHD adults.

## **Methods**

In relation to candidate gene association studies, the cut-off used to define a positive or negative association was set to a canonic p value  $< 0.05$  after the correction for multiple tests. In relation to genome-wide association studies both for common (SNPs) and rare (CNVs) variants, the cut-off was set to a arbitrary p value of  $1 \times 10^{-5}$ . We consulted three recent papers (Poelmans et al. 2011; Lotan et al. 2014; Hawi et al. 2015) showing the best genes associated to ADHD according to SNPs/CNVs-GWA approaches. The genes showing associations with a p value of  $1 \times 10^{-5}$  were tested if belonging to cADHD and aADHD.

For all genes/proteins, the results were obtained considering each single study, thus the meta-analyses available for each of them were divided into single studies.

A total of eligibility 350 findings from genomics and metabolomics were found for cADHD and 91 for aADHD (PRISMA Flow-chart, Figure 1).

## **Statistical analyses**

Supplementary Table 1 shows a database that comprises all genes and proteins implicated by genomic and metabolomic studies of cADHD and of aADHD. It reports positive and negative results for each gene/polymorphism/protein. The calculations were performed considering single studies and a study performed on two populations (a replica) was calculated twice.

The histogram showed in Figure 2 was the result obtained performing the following calculations:

$\{[(\text{positive findings} - \text{negative findings})]/\text{total findings}=833\} \times 100$  in children

$\{[(\text{positive findings} - \text{negative findings})]/\text{total findings}=249\} \times 100$  in adults

Supplementary Tables 2 shows the statistical analyses (2-way Contingency Table Analysis) in relation to the different molecular pathways associated to cADHD and/or aADHD.

The analyses were performed by using the software SPSS vs 12.

## References of supplementary material

- Akutagava-Martins GC, Salatino-Oliveira A, Genro JP, Contini V, Polanczyk G, Zeni C, Chazan R, Kieling C, Anselmi L, Menezes AM, Grevet EH, Bau CH, Rohde LA, Hutz MH. 2014. Glutamatergic copy number variants and their role in attention-deficit/hyperactivity disorder. *Am J Med Genet B Neuropsychiatr Genet* 165B(6):502–9.
- Elia J, Gai X, Xie HM, Perin JC, Geiger E, Glessner JT, D'arcy M, deBerardinis R, Frackelton E, Kim C, et al. 2010. Rare structural variants found in attention-deficit hyperactivity disorder are preferentially associated with neurodevelopmental genes. *Mol Psychiatry* 15(6):637–46.
- Elia J, Glessner JT, Wang K, Takahashi N, Shtir CJ, Hadley D, Sleiman PM, Zhang H, Kim CE, Robison R, et al. 2011. Genome-wide copy number variation study associates metabotropic glutamate receptor gene networks with attention deficit hyperactivity disorder. *Nat Genet* 44(1):78–84.
- Gizer IR, Ficks C, Waldman ID. 2009. Candidate gene studies of ADHD: a meta-analytic review. *Hum Genet* 126(1):51–90.
- Hawi Z, Cummins TD, Tong J, Johnson B, Lau R, Samarraï W, Bellgrove MA. 2015. The molecular genetic architecture of attention deficit hyperactivity disorder. *Mol Psychiatry* 20(3):289–97.
- Hinney A, Scherag A, Jarick I, Albayrak Ö, Pütter C, Pechlivanis S, Dauvermann MR, Beck S, Weber H, Scherag S, et al. 2011. Genome-wide association study in German patients with attention deficit/hyperactivity disorder. *Am J Med Genet B Neuropsychiatr Genet* 156B(8):888–97.
- Jarick I, Volckmar AL, Pütter C, Pechlivanis S, Nguyen TT, Dauvermann MR, Beck S, Albayrak Ö, Scherag S, Gilsbach S et al. 2014. Genome-wide analysis of rare copy number variations reveals PARK2 as a candidate gene for attention-deficit/hyperactivity disorder. *Mol Psychiatry* 19(1):115–21.
- Landaas ET, Johansson S, Jacobsen KK, Ribasés M, Bosch R, Sánchez-Mora C, Jacob CP, Boreatti-Hümmer A, Kreiker S, Lesch KP, et al. 2010. An international multicenter association

study of the serotonin transporter gene in persistent ADHD. *Genes Brain Behav* 9(5):449–58.

Lasky-Su J, Neale BM, Franke B, Anney RJ, Zhou K, Maller JB, Vasquez AA, Chen W, Asherson P, Buitelaar J, et al. 2008. Genome-wide association scan of quantitative traits for attention deficit hyperactivity disorder identifies novel associations and confirms candidate gene associations. *Am J Med Genet B Neuropsychiatr Genet*. 147B(8):1345–54.

Lee YH, Song GG. 2015. BDNF 196 G/A and COMT Val158Met Polymorphisms and Susceptibility to ADHD: A Meta-Analysis. *J Atten Disord* 5.

Lesch KP, Selch S, Renner TJ, Jacob C, Nguyen TT, Hahn T, Ullmann R. 2011. Genome-wide copy number variation analysis in attention-deficit/hyperactivity disorder: association with neuropeptide Y gene dosage in an extended pedigree. *Mol Psychiatry* 16(5):491-503.

Lesch KP, Timmesfeld N, Renner TJ, Halperin R, Röser C, Nguyen TT, Craig DW, Romanos J, Heine M, Meyer J, et al. 2008. Molecular genetics of adult ADHD: converging evidence from genome-wide association and extended pedigree linkage studies. *J Neural Transm (Vienna)* 115(11):1573–85.

Lionel AC, Crosbie J, Barbosa N, Goodale T, Thiruvahindrapuram B, Rickaby J, Gazzellone M, Carson AR, Howe JL, Wang Z, et al. 2011. Rare copy number variation discovery and cross-disorder comparisons identify risk genes for ADHD. *Sci Transl Med* 3(95):95ra75.

Lotan A, Fenckova M, Bralten J, Alttoa A, Dixson L, Williams RW, van der Voet M. 2014. Neuroinformatic analyses of common and distinct genetic components associated with major neuropsychiatric disorders. *Front Neurosci* 8:331.

Mick E, Todorov A, Smalley S, Hu X, Loo S, Todd RD, Biederman J, Byrne D, Dechairo B, Guiney A, et al. 2010. Family-based genome-wide association scan of attention-deficit/hyperactivity disorder. *J Am Acad Child Adolesc Psychiatry* 49(9):898-905 e3.

Neale BM, Lasky-Su J, Anney R, Franke B, Zhou K, Maller JB, Vasquez AA, Asherson P, Chen W, Banaschewski T, et al. 2008. Genome-wide association scan of attention deficit hyperactivity disorder. *Am J Med Genet B Neuropsychiatr Genet* 147B(8):1337–44.

Neale BM, Medland S, Ripke S, Anney RJ, Asherson P, Buitelaar J, Franke B, Gill M, Kent L, Holmans P, et al. 2010. Case-control genome-wide association study of attention-deficit/hyperactivity disorder. *J Am Acad Child Adolesc Psychiatry* 49(9):906–20.

Pan YQ, Qiao L, Xue XD, Fu JH. 2015. Association between ANKK1 (rs1800497) polymorphism of DRD2 gene and attention deficit hyperactivity disorder: a meta-analysis. *Neurosci Lett* 590:101–5.

Poelmans, G, Pauls DL, Buitelaar JK, Franke B. 2011. Integrated genome-wide association study findings: identification of a neurodevelopmental network for attention deficit hyperactivity disorder. *Am J Psychiatry* 168(4):365–77.

Ramos-Quiroga JA, Sánchez-Mora C, Casas M, Garcia-Martínez I, Bosch R, Nogueira M, Corrales M, Palomar G, Vidal R, Coll-Tané M, et al. 2014. Genome-wide copy number variation analysis in adult attention-deficit and hyperactivity disorder. *J Psychiatr Res* 49:60–7.

Reif A, Nguyen TT, Weissflog L, Jacob CP, Romanos M, Renner TJ, Butterschön HN, Kittel-Schneider S, Gessner A, Weber H, et al. 2011. DIRAS2 is associated with adult ADHD, related traits, and co-morbid disorders. *Neuropsychopharmacology* 36(11): 2318–27.

Sánchez-Mora C, Ramos-Quiroga JA, Bosch R, Corrales M, Garcia-Martínez I, Nogueira M, Págerols M, Palomar G, Richarte V, Vidal R, et al. 2015. Case-control genome-wide association study of persistent attention-deficit hyperactivity disorder identifies FBXO33 as a novel susceptibility gene for the disorder. *Neuropsychopharmacology: Official Publication of the American College of Neuropsychopharmacology* 40(4):915–26.

Sánchez-Mora C, Ribasés M, Casas M, Bayés M, Bosch R, Fernández-Castillo N, Brunso L, Jacobsen KK, Landaas ET, Lundervold AJ, et al. 2011. Exploring DRD4 and its interaction with SLC6A3 as possible risk factors for adult ADHD: a meta-analysis in four European populations. *Am J Med Genet B Neuropsychiatr Genet* 156B(5): 600–12.

Shiffrin ND, Gruber J, Glatt SJ, Faraone SV. 2013. No association between MspI allele of the ADRA2A polymorphism and ADHD: meta-analysis of family-based studies. *Psychiatr Genet*

23(4):174–5.

Smith TF. 2010. Meta-analysis of the heterogeneity in association of DRD4 7-repeat allele and AD/HD: stronger association with AD/HD combined type. *Am J Med Genet B Neuropsychiatr Genet* 153B(6):1189–99.

Stergiakouli E, Hamshere M, Holmans P, Langley K, Zaharieva I; deCODE Genetics; Psychiatric GWAS Consortium, Hawi Z, Kent L, Gill M, et al. 2012. Investigating the contribution of common genetic variants to the risk and pathogenesis of ADHD. *Am J Psychiatry* 169(2):186-94.

Sun H, Yuan F, Shen X, Xiong G, Wu J. 2014. Role of COMT in ADHD: a systematic meta-analysis. *Mol Neurobiol* 49(1):251–61.

Williams NM, Franke B, Mick E, Anney RJ, Freitag CM, Gill M, Thapar A, O'Donovan MC, Owen MJ, Holmans P, et al. 2012. Genome-wide analysis of copy number variants in attention deficit hyperactivity disorder: the role of rare variants and duplications at 15q13.3. *Am J Psychiatry* 169(2):195–204.

Williams NM, Zaharieva I, Martin A, Langley K, Mantripragada K, Fossdal R, Stefansson H, Stefansson K, Magnusson P, Gudmundsson OO, et al. 2010. Rare chromosomal deletions and duplications in attention-deficit hyperactivity disorder: a genome-wide analysis. *Lancet* 376(9750):1401-8.

Wu J, Xiao H, Sun H, Zou L, Zhu LQ. 2012. Role of dopamine receptors in ADHD: a systematic meta-analysis. *Mol Neurobiol* 45(3):605–20.

Yang L, Neale BM, Liu L, Lee SH, Wray NR, Ji N, Li H, Qian Q, Wang D, Li J, et al. 2013. Polygenic transmission and complex neuro developmental network for attention deficit hyperactivity disorder: genome-wide association study of both common and rare variants. *American Journal of Medical genetics. Part B, Neuropsychiatric Genetics : The Official Publication of the International Society of Psychiatric Genetics* 162B(5):419–30.
